# Supplementary material for: Tabelecleucel for EBV+ PTLD after allogeneic HCT or SOT in a multicenter expanded access protocol
Source: PubMed Central journal article supplement — Blood Adv. 2024 Apr 17;8(12):3001–12. doi: 10.1182/bloodadvances.2023011626 (PMC11215195; doi:10.1182/bloodadvances.2023011626), 2024-04-17

## Supplementary Data

### **Tabelecleucel for EBV<sup>+</sup> PTLD following allogeneic HCT or SOT in a multicenter expanded access protocol**

Nikiforow S, Whangbo JS, Reshef R *et al*

This appendix has been provided by the authors to give readers additional information about their work.

## Supplemental Table 1. Key Inclusion and Exclusion Criteria

### Key Inclusion Criteria

Diagnosis of EBV<sup>+</sup> PTLD after allogeneic HCT or SOT

Presence of EBV<sup>+</sup> disease (as shown on biopsy or a combination of circulating EBV DNA and radiographic appearance consistent with an EBV<sup>+</sup> malignancy, if biopsy is not clinically feasible)

Availability of appropriate HLA partially matched and restricted tabellecleucel cell product

Lack of approved alternative therapies

ECOG performance status  $\leq 4^*$  or Lansky performance status  $\geq 20^\dagger$

Morphologic remission of underlying disease for patients receiving allogeneic HCT

Adequate organ function per the following:

- Absolute neutrophil count  $\geq 500/\mu\text{L}$   $\pm$  cytokine support
- Platelets  $\geq 50,000/\mu\text{L}$   $\pm$  transfusion support
- Platelets  $< 50,000/\mu\text{L}$  but  $\geq 20,000/\mu\text{L}$   $\pm$  transfusion support permissible if the patient had not had grade  $\geq 2$  bleeding in the preceding 6 months (per NCI-CTCAE v4.03)
- Alanine aminotransferase, aspartate aminotransferase, total bilirubin  $< 3 \times \text{ULN}$  or  $\leq 5 \times \text{ULN}$  if abnormal due to EBV-associated disease involvement of the liver
- Creatinine  $< 3 \times \text{ULN}$

### Key Exclusion Criteria

Any investigational therapy received  $\leq 4$  weeks prior to cycle 1 day 1

Ongoing need for methotrexate or extracorporeal photopheresis; patients receiving corticosteroid therapy  $> 0.5 \text{ mg/kg}$  daily were excluded

Need for vasopressor or ventilatory support, unless deemed to be caused by the EBV<sup>+</sup> process that tabellecleucel is designed to treat

Antithymocyte globulin, alemtuzumab, or similar T-cell antibody therapy or T-cell therapy received  $\leq 4$  weeks prior to cycle 1 day 1

EBV, Epstein-Barr virus; EBV<sup>+</sup>, Epstein-Barr virus positive; ECOG, Eastern Cooperative Oncology Group; HCT, hematopoietic cell transplant; HLA, human leukocyte antigen; NCI-CTCAE, National Cancer Institute's Common Terminology Criteria for Adverse Events; PTLD, post-transplant lymphoproliferative disease; SOT, solid organ transplant ULN, upper limit of normal.

\*For patients aged  $> 16$  years.

†For patients aged  $\leq 16$  years.

**Supplemental Table 2. Definitions of Secondary Efficacy Endpoints**

| <b>Secondary endpoint</b> | <b>Definition</b>                                                                                                        |
|---------------------------|--------------------------------------------------------------------------------------------------------------------------|
| OS                        | Time from first dose of tacelecleucel to date of death from any cause                                                    |
| Time to response          | Time from the first dose of tacelecleucel to first response (PR or CR)                                                   |
| Duration of response      | Measured from the time of initial response until disease progression after the last response or death due to any cause   |
| Progression-free survival | Time from the first dose of tacelecleucel to either progression after the last response or death, whichever occurs first |
| Durable response rate     | Response with a duration >6 months; defined as the proportion of patients with durable response                          |
| Time to progression       | Time from the first dose of tacelecleucel to progression after the last response                                         |

CR, complete response; OS, overall survival; PR, partial response.

**Supplemental Figure 1. Forest Plots of Objective Response Rate for the A) HCT (n=14) and B) SOT (n=12) Cohorts**

**A. HCT cohort (n=14)**

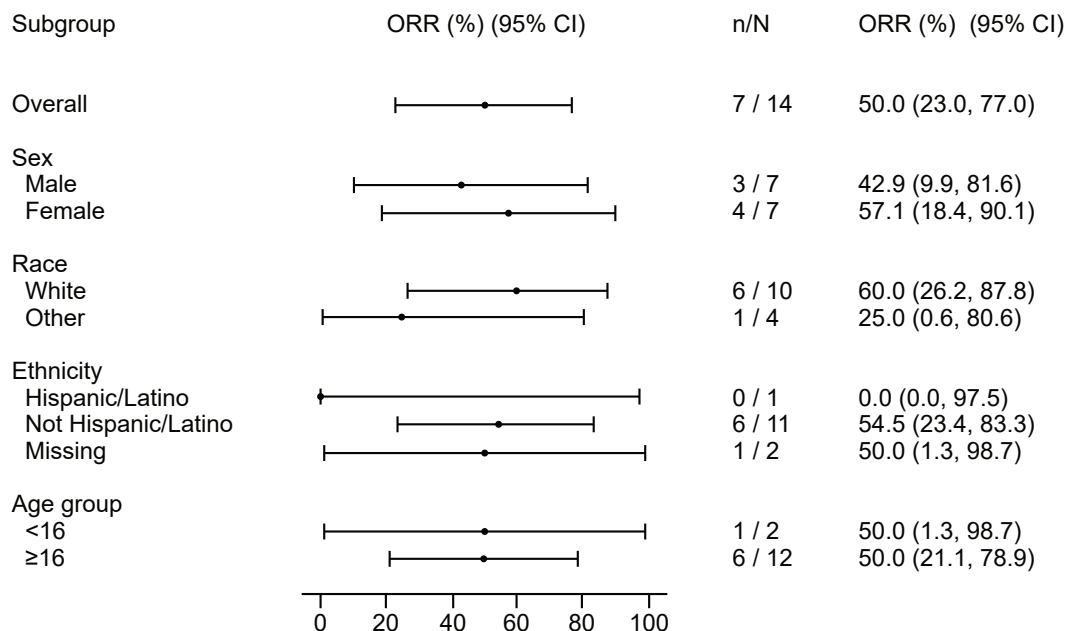

**B. SOT cohort (n=12)**

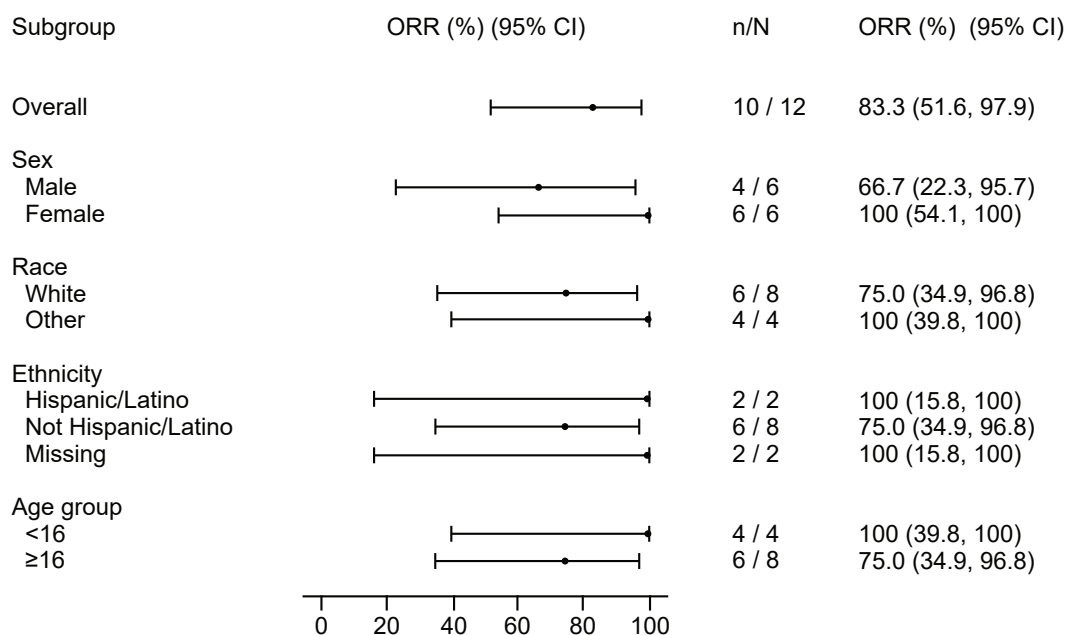

Supplement: BLOODA_ADV-2023-011626-mmc1.pdf [file BLOODA_ADV-2023-011626-mmc1.pdf]
